# Supplementary material for: Aberrant STAT phosphorylation signaling in peripheral blood mononuclear cells from multiple sclerosis patients
Source: PubMed Central journal article supplement (PMC5840794; doi:10.1186/s12974-018-1105-9), 2018-03-07
Supplement: 12974_2018_1105_MOESM1_ESM.pdf [file 12974_2018_1105_MOESM1_ESM.pdf]

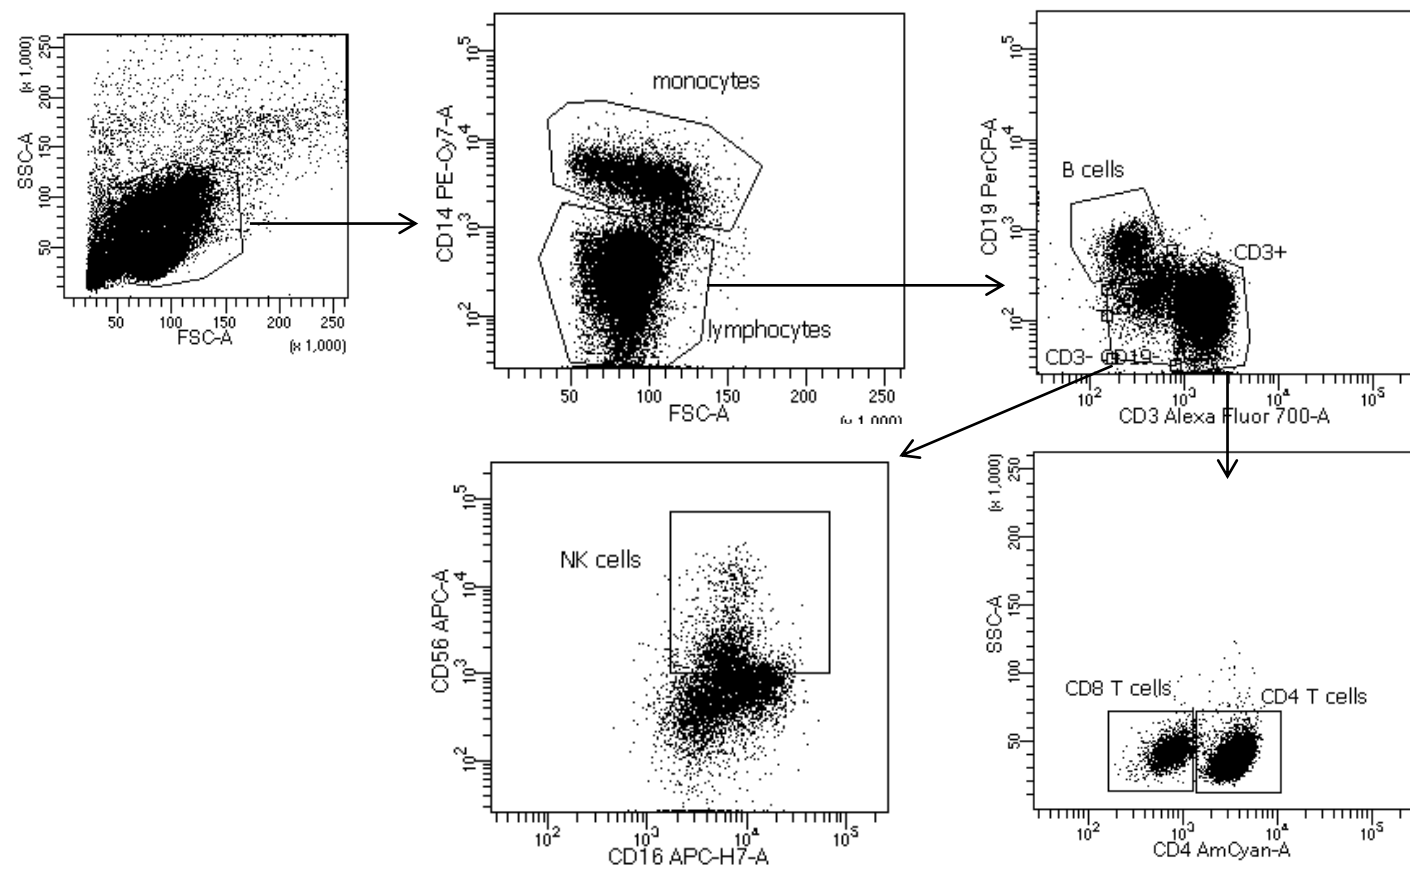

| Molecule                 | Clone                     | Molecule                    | Clone                       |
|--------------------------|---------------------------|-----------------------------|-----------------------------|
| Human-CD3                | UCHT1 (BD biosciences)    | Stat1 (pY701)               | 14/P-STAT1 (BD biosciences) |
| Human-CD4                | RPA-T4 (BD biosciences)   | Stat3 (pY705)               | 4/P-STAT3 (BD biosciences)  |
| Human-CD19               | HIB19 (BD biosciences)    | Stat4 (pY693)               | 28/P-STAT4 (BD biosciences) |
| Human-CD14               | M5E2 (BD biosciences)     | Stat5 (pY694)               | 47/STAT5 (BD biosciences)   |
| Human-CD16               | B73.1 (BD biosciences)    | Stat6 (pY641)               | 18/P-STAT6 (BD biosciences) |
| Human-CD56               | B159 (BD biosciences)     | Stat1                       | 1/Stat1 (BD biosciences)    |
| Akt (pS473)              | M89-61 (BD biosciences)   | Stat6                       | 23/Stat6 (BD biosciences)   |
| Btk (pY551)/ Itk (pY511) | 24a/BTK (BD biosciences)  | Anti-rabbit Alexa Fluor 488 | #4412 (cell signaling)      |
| PLCγ1 (pY783)            | 27/PLC (BD biosciences)   | HLA-E                       | 3D12 (Biolegend)            |
| c-Cbl (pY700)            | 47/c-Cbl (BD biosciences) | HLA-ABC                     | W6/32 (Biolegend)           |
| p38MAPK (pT180/pY182)    | 36/p38 (BD biosciences)   | HLA-DR                      | L243 (Biolegend)            |
| p38MAPK                  | D13E1 (cell signaling)    | Mouse-CD3e                  | 145-2C11 (BD Pharmingen)    |
| Erk1/2 (pT202/2Y204)     | 20A (BD biosciences)      | Mouse-CD19                  | ID3 (BD Pharmingen)         |
| Erk1/2                   | 137F5 (cell signaling)    | Mouse-CD4                   | GK1.5 (BD Pharmingen)       |
|                          |                           | Mouse-CD8a                  | 53-6.7 (BD Pharmingen)      |
